# Supplementary material for: Rational valence modulation of bimetallic carbide assisted by defect engineering to enhance polysulfide conversion for lithium–sulfur batteries
Source: Royal Society of Chemistry journal article supplement (doi:10.1039/d0ta05927g), 2020-01-01
Supplement: d0ta05927g1.pdf [file d0ta05927g1.pdf]

**Rational valence modulation of bimetallic carbide assisted by defect engineering  
to enhance polysulfide conversion for lithium-sulfur batteries**

Ting Yang <sup>a,b</sup>, Kunlin Liu <sup>a,b</sup>, Tianli Wu <sup>a,b</sup>, Jizong Zhang <sup>a,b</sup>, Xuewen Zheng <sup>a,b</sup>,  
Chengyang Wang <sup>a,b</sup>, Mingming Chen <sup>a,b,\*</sup>.

<sup>a</sup> Key Laboratory for Green Chemical Technology of MOE, School of Chemical Engineering and Technology, Tianjin University, Tianjin 300072, P. R. China

<sup>b</sup> Collaborative Innovation Center of Chemical Science and Engineering (Tianjin), Tianjin 300072, P. R. China

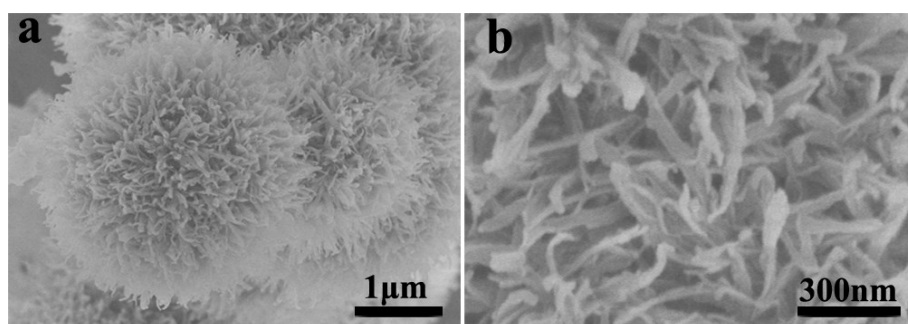

**Figure S1.** The SEM (a) and HRSEM (b) images of NiZn-MOF.

As shown in Figure S1 a, NiZn-MOF composites exhibit a flower-like structure with a diameter of about 3.5 ~ 2.5 μm. The HRSEM image (Figure S2 b) indicates that NiZn-MOF composites are consisted of abundant nanosheets, which is beneficial to expose more active sites.

---

\* Corresponding author:

Tel: +86-22-27890481. E-mail: chmm@tju.edu.cn (Mingming Chen)

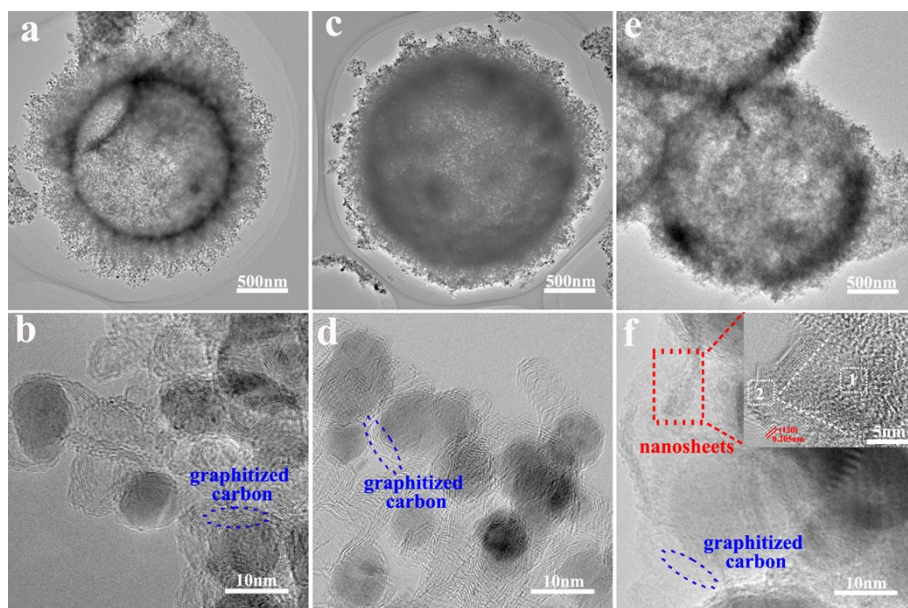

**Figure S2.** (a-b) The TEM images of  $C/Ni_3ZnC_{0.7}$  nanospheres. (c-d) The TEM images of  $C/Ni_3ZnC_{0.7}$ -P5 nanospheres. (e-f) The TEM images of  $C/Ni_3ZnC_{0.7}$ -B1 nanospheres. The inset is the corresponding HRTEM image of figure f.

As shown in Figure S2,  $C/Ni_3ZnC_{0.7}$ ,  $C/Ni_3ZnC_{0.7}$ -P5 and  $C/Ni_3ZnC_{0.7}$ -B1 nanospheres are composed of 8-15 nm nanoparticles with typical hollow structures. Such ultrathin nanoparticles and hollow structure contribute to dense exposure of active sites. The graphitized carbon shells might come from the catalytic graphitization behavior of  $C/Ni_3ZnC_{0.7}$  nanoparticles, which is positive for charge transfer process.

Besides, after the  $NaBH_4$  etching process, a bit of nanosheets are appearing on the surface of  $C/Ni_3ZnC_{0.7}$ -B1. And the area with nanosheets is specifically chosen as shown in Figure S2 f. The close look of the nanosheet (Figure S2 f) indicates that it can be divided into two parts (donated as area 1 and 2). The amorphous area (area 1) should be attributed to amorphous nickel borides ( $Ni_xB$ ), which comes from the reaction between the  $Ni_3ZnC_{0.7}$  and  $NaBH_4$ . However, it should be noted that the crystalline structure of some nanoparticles in area 2 became robust under electron irradiation. And the short-range lattice fringe of 0.205 nm is corresponding to the (120)

planes of  $\text{Ni}_3(\text{BO}_3)_2$ <sup>1</sup>. The formation of  $\text{Ni}_3(\text{BO}_3)_2$  is attributed to the hydrolysis of  $\text{NaBH}_4$ . The  $\text{NaBH}_4$  itself could hydrolyze to obtain  $\text{H}_3\text{BO}_3$  and such hydrolysis process could be accelerated by metal borides.<sup>1,2</sup> Therefore, once the amorphous  $\text{Ni}_x\text{B}$  forms, the generation of borate anions ( $\text{BO}_3^{2-}$ ) would be enhanced to accumulate around the nearly formed  $\text{Ni}_x\text{B}$ , followed by turning the amorphous  $\text{Ni}_x\text{B}$  to  $\text{Ni}_3(\text{BO}_3)_2$ <sup>1,2</sup>.

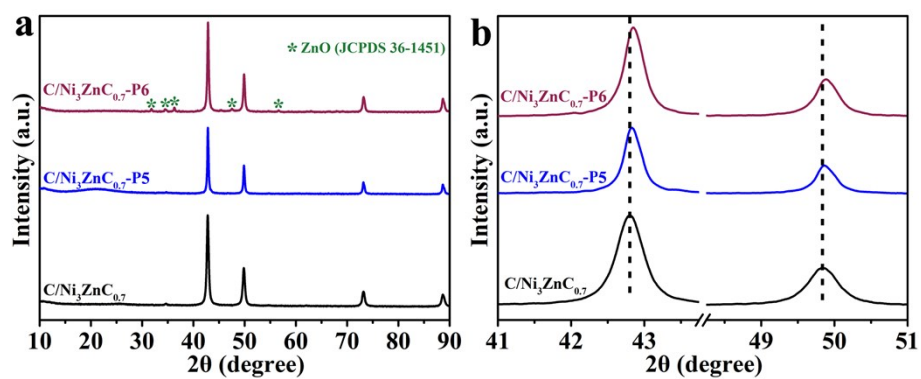

**Figure S3.** (a-b) The XRD patterns of C/Ni<sub>3</sub>ZnC<sub>0.7</sub> nanospheres, C/Ni<sub>3</sub>ZnC<sub>0.7</sub>-P5 nanospheres and C/Ni<sub>3</sub>ZnC<sub>0.7</sub>-P6 nanospheres.

Although P atom is larger than C in atomic radius, the loss of Zn results in decreased lattice parameters,<sup>3</sup> attested by the slightly positive shift of XRD peaks in C/Ni<sub>3</sub>ZnC<sub>0.7</sub>-P5 and C/Ni<sub>3</sub>ZnC<sub>0.7</sub>-P6 (Figure S3 b).

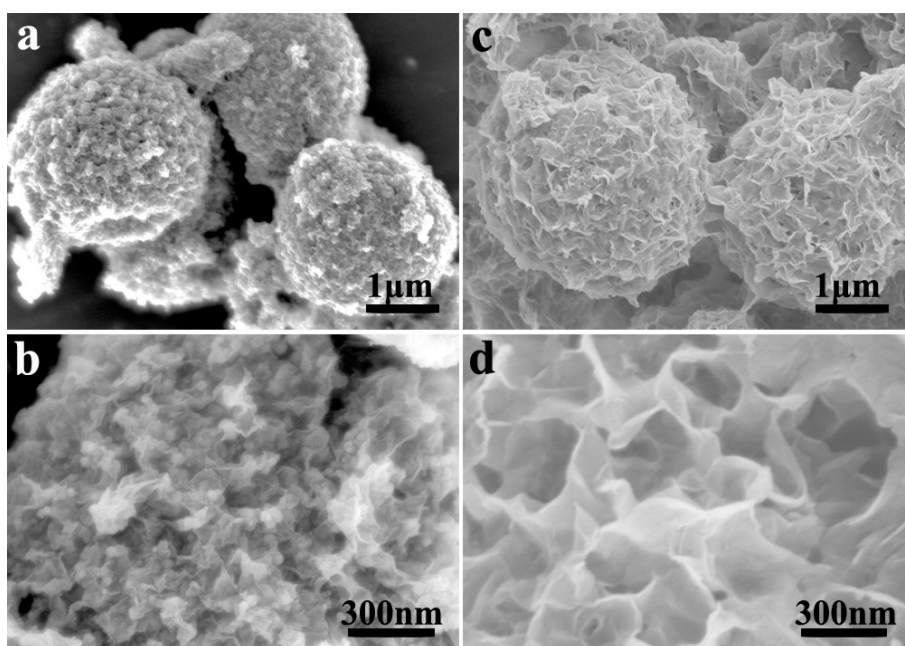

**Figure S4** (a-b) The SEM images of C/Ni<sub>3</sub>ZnC<sub>0.7</sub>-B2 nanospheres. (c-d) The SEM images of C/Ni<sub>3</sub>ZnC<sub>0.7</sub>-B4 nanospheres.

As shown in Figure S4 a and b, when increasing the concentration of the NaBH<sub>4</sub> solution to 0.02 mol L<sup>-1</sup>, more nanosheets appear on the surface of the C/Ni<sub>3</sub>ZnC<sub>0.7</sub>-B2 nanospheres, rendering slightly collapse of spherical structure. Further increasing the concentration of the NaBH<sub>4</sub> solution to 0.04 mol L<sup>-1</sup> (Figure S4 c and d), C/Ni<sub>3</sub>ZnC<sub>0.7</sub>-B4 are almost covered by plenty of nanosheets.

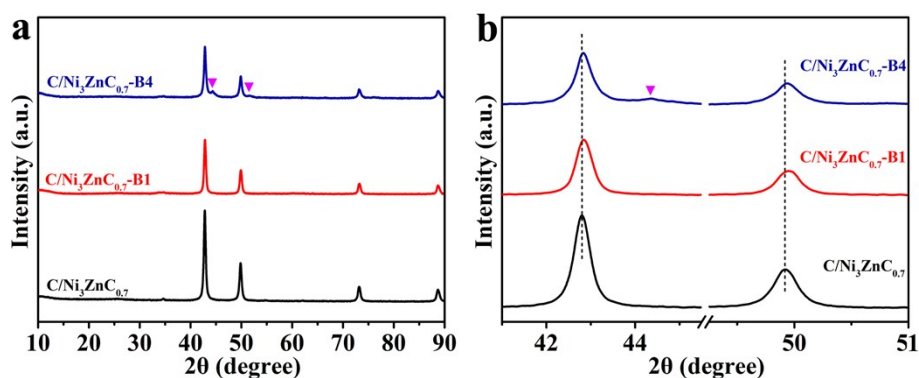

**Figure S5.** (a-b) The XRD patterns of C/Ni<sub>3</sub>ZnC<sub>0.7</sub> nanospheres, C/Ni<sub>3</sub>ZnC<sub>0.7</sub>-B1 nanospheres and C/Ni<sub>3</sub>ZnC<sub>0.7</sub>-B4 nanospheres.

When the concentration of NaBH<sub>4</sub> solution is 0.04 mol L<sup>-1</sup>, C/Ni<sub>3</sub>ZnC<sub>0.7</sub>-B4 is covered by plenty of smooth nanosheets and presents a broad XRD peak at 44.4°, supporting the existence the amorphous Ni<sub>x</sub>B phase (Figure S4 c-d and S5 a-b)<sup>1,4</sup>. As the concentration of NaBH<sub>4</sub> solution decreases to 0.01 mol L<sup>-1</sup>, the nanosheets become tiny as well as less and out of XRD detection range (Figure 1e-f, and S5 a-b). The amorphous Ni<sub>x</sub>B phase indicates NaBH<sub>4</sub>-etching process makes some Ni cations out of Ni<sub>3</sub>ZnC<sub>0.7</sub> lattice, rendering a Ni vacancy-rich structure. Besides, the loss of Ni leads to a slightly decreased lattice parameter,<sup>3</sup> attested by the slightly positive shift of XRD peaks in C/Ni<sub>3</sub>ZnC<sub>0.7</sub>-B1 and C/Ni<sub>3</sub>ZnC<sub>0.7</sub>-B4 (Figure S5 b).

**Table S1.** The elemental content measured by EDS.

| <b>Samples</b>                              | <b>C (at/%)</b> | <b>O (at/%)</b> | <b>Zn (at/%)</b> | <b>Ni (at/%)</b> | <b>P (at/%)</b> | <b>B (at/%)</b> |
|---------------------------------------------|-----------------|-----------------|------------------|------------------|-----------------|-----------------|
| <b>C/Ni<sub>3</sub>ZnC<sub>0.7</sub></b>    | 74.07           | 2.56            | 5.81             | 17.56            | -               | -               |
| <b>C/Ni<sub>3</sub>ZnC<sub>0.7</sub>-P5</b> | 26.33           | 10.99           | 14.51            | 46.78            | 1.38            | -               |
| <b>C/Ni<sub>3</sub>ZnC<sub>0.7</sub>-B1</b> | 48.84           | 16.64           | 4.85             | 13.91            | -               | 15.75           |

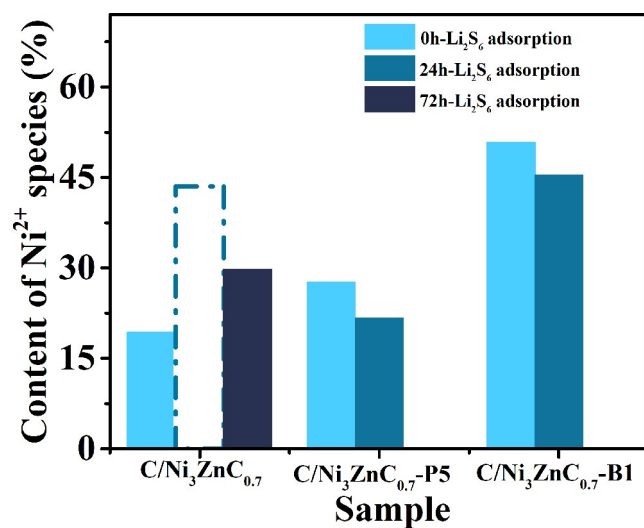

**Figure S6.** The content of Ni<sup>2+</sup> species in different samples obtained by XPS.

**Table S2.** The content of Ni<sup>2+</sup> and Ni(0) species in different samples obtained by XPS.

| Samples                                                                    | Ni <sup>2+</sup> ration in Ni 2p Ni(0) ration in Ni |               | The ratio of<br>Ni <sup>2+</sup> to Ni(0) |
|----------------------------------------------------------------------------|-----------------------------------------------------|---------------|-------------------------------------------|
|                                                                            | region (%)                                          | 2p region (%) |                                           |
| Ni <sub>3</sub> ZnC <sub>0.7</sub>                                         | 19.12                                               | 66.69         | 0.29                                      |
| Ni <sub>3</sub> ZnC <sub>0.7</sub> -P5                                     | 27.68                                               | 56.62         | 0.49                                      |
| Ni <sub>3</sub> ZnC <sub>0.7</sub> -B1                                     | 50.83                                               | 15.76         | 3.23                                      |
| Ni <sub>3</sub> ZnC <sub>0.7</sub> -Li <sub>2</sub> S <sub>6</sub> -24h    | 43.52                                               | 30.44         | 1.43                                      |
| Ni <sub>3</sub> ZnC <sub>0.7</sub> -Li <sub>2</sub> S <sub>6</sub> -72h    | 29.75                                               | 51.89         | 0.57                                      |
| Ni <sub>3</sub> ZnC <sub>0.7</sub> -P5-Li <sub>2</sub> S <sub>6</sub> -24h | 21.65                                               | 62.80         | 0.34                                      |
| Ni <sub>3</sub> ZnC <sub>0.7</sub> -B1-Li <sub>2</sub> S <sub>6</sub> -24h | 45.40                                               | 29.13         | 1.56                                      |

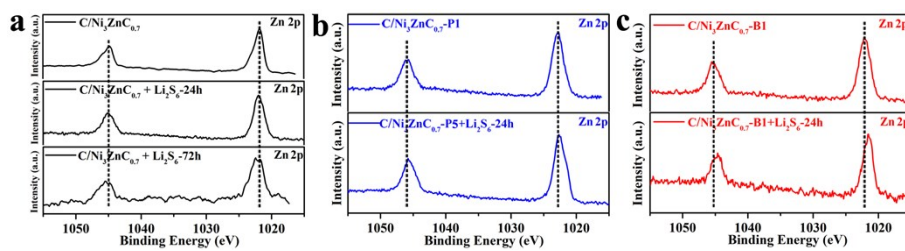

**Figure S7.** (a) High-resolution Zn 2p XPS spectra of  $C/Ni_3ZnC_{0.7}$  nanospheres before  $Li_2S_6$  adsorption test, after adding in  $Li_2S_6$  solution for 24 h and 72 h. (b) High-resolution Zn 2p XPS spectra of  $C/Ni_3ZnC_{0.7}$ -P5 nanospheres before and after adding in  $Li_2S_6$  solution for 24 h. (c) High-resolution Zn 2p XPS spectra of  $C/Ni_3ZnC_{0.7}$ -B1 nanospheres before and after adding in  $Li_2S_6$  solution for 24 h.

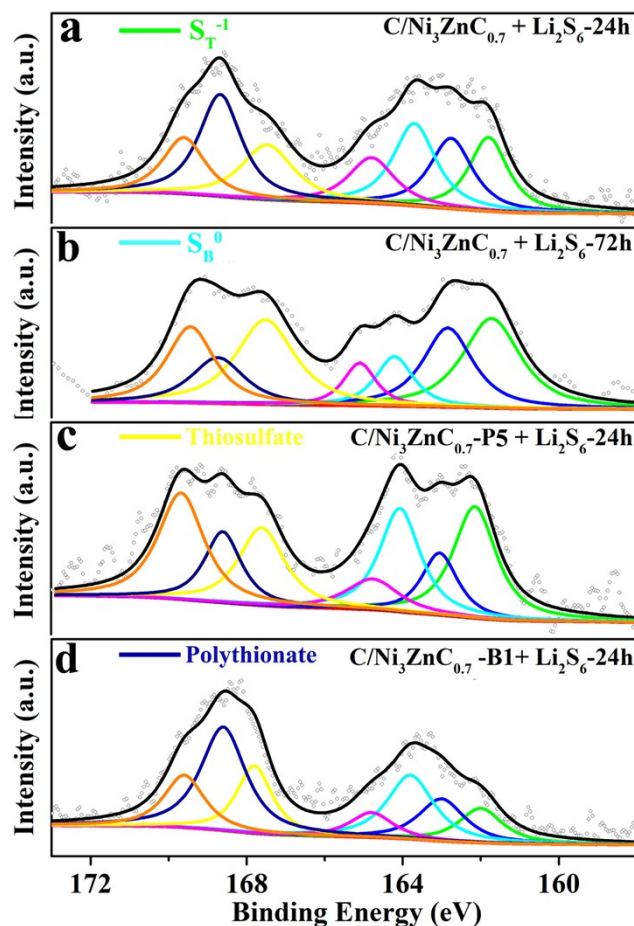

**Figure S8.** (a) High-resolution S 2p XPS spectra of C/Ni<sub>3</sub>ZnC<sub>0.7</sub> nanospheres after adding in Li<sub>2</sub>S<sub>6</sub> solution for 24 h. (b) High-resolution S 2p XPS spectra of C/Ni<sub>3</sub>ZnC<sub>0.7</sub> nanospheres after adding in Li<sub>2</sub>S<sub>6</sub> solution for 72 h. (c) High-resolution S 2p XPS spectra of C/Ni<sub>3</sub>ZnC<sub>0.7</sub>-P5 nanospheres after adding in Li<sub>2</sub>S<sub>6</sub> solution for 24 h. (d) High-resolution S 2p XPS spectra of C/Ni<sub>3</sub>ZnC<sub>0.7</sub>-B1 nanospheres after adding in Li<sub>2</sub>S<sub>6</sub> solution for 24 h.

Owing to the chemical interaction between polysulfides and metal active sites, thiosulfate and polythionate species located at 167.5 eV and 168.6 eV are generated at the surface of these three samples (Figure S8 a-d).<sup>5</sup> The generation of thiosulfate comes from the oxidation of S<sub>4</sub><sup>2-</sup> by Ni<sup>2+</sup>, thereby contributing to the decrease of Ni<sup>2+</sup> species and increase of Ni(0) species (Figure S6 and Table S1).<sup>5</sup> Such thiosulfate could anchor long-chain polysulfides to yield polythionate and Li<sub>2</sub>S<sub>2</sub>/Li<sub>2</sub>S, which provides a new path for accelerating the conversion of polysulfides.<sup>6</sup>

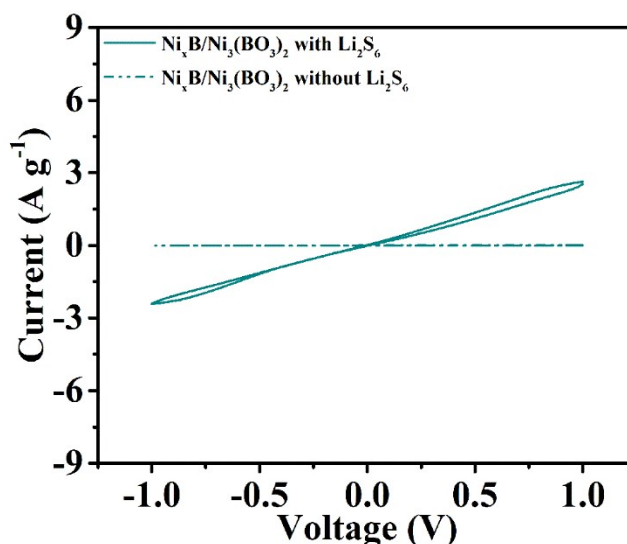

**Figure S9.** CV curves of symmetric cell with identical electrodes of  $\text{Ni}_x\text{B}/\text{Ni}_3(\text{BO}_3)_2$  using  $\text{Li}_2\text{S}_6$  electrolyte or  $\text{Li}_2\text{S}_6$ -free electrolyte at a scan rate of  $10 \text{ mV s}^{-1}$ .

The  $\text{Ni}_x\text{B}/\text{Ni}_3(\text{BO}_3)_2$  nanosheets were synthesized by adding the  $\text{NaBH}_4$  into the  $\text{Ni}(\text{NO}_3)_2$  solution according to the previously reported work.<sup>7</sup> And the symmetric cells were assembled by using  $\text{Ni}_x\text{B}/\text{Ni}_3(\text{BO}_3)_2$  electrodes as working and counter electrodes,  $40 \mu\text{L}$   $\text{Li}_2\text{S}_6$  solution ( $1.2 \text{ mol L}^{-1}$ , based on element S) as the electrolyte, and pure PP as the separator. As shown in Figure S9, the redox current of  $\text{Ni}_x\text{B}/\text{Ni}_3(\text{BO}_3)_2$  ( $2.5 \text{ A g}^{-1}$ ) is much lower than  $\text{C}/\text{Ni}_3\text{ZnC}_{0.7}\text{-B1}$  ( $7.9 \text{ A g}^{-1}$ ), indicating that the enhanced catalytic activity mainly comes from the Ni vacancies and optimized  $\text{Ni}^{2+}/\text{Ni}(0)$  structures rather  $\text{Ni}_x\text{B}/\text{Ni}_3(\text{BO}_3)_2$  phase.

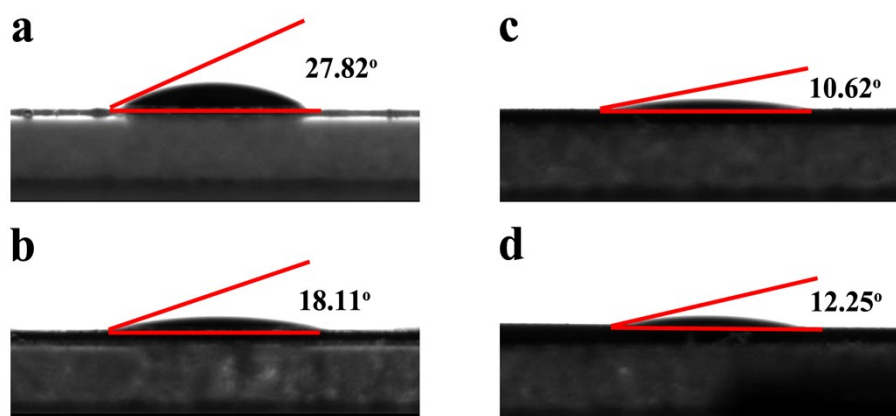

**Figure S10.** (a-d) The contact angles of pure PP, C/Ni<sub>3</sub>ZnC<sub>0.7</sub>@PP, C/Ni<sub>3</sub>ZnC<sub>0.7</sub>-P5@PP and C/Ni<sub>3</sub>ZnC<sub>0.7</sub>-B1@PP, respectively.

**Table S3.** EIS fitting results of pristine cells with C/Ni<sub>3</sub>ZnC<sub>0.7</sub>@PP, C/Ni<sub>3</sub>ZnC<sub>0.7</sub>-P5@PP and C/Ni<sub>3</sub>ZnC<sub>0.7</sub>@PP and pure PP separator.

| <b>Sample</b>                                  | <b><math>R_s/\Omega</math></b> | <b><math>R_{surf}/\Omega</math></b> | <b><math>R_{ct}/\Omega</math></b> |
|------------------------------------------------|--------------------------------|-------------------------------------|-----------------------------------|
| <b>Pure PP</b>                                 | 2.01                           | 19.45                               | 15.86                             |
| <b>C/Ni<sub>3</sub>ZnC<sub>0.7</sub>@PP</b>    | 2.76                           | 14.13                               | 6.65                              |
| <b>C/Ni<sub>3</sub>ZnC<sub>0.7</sub>-P5@PP</b> | 1.94                           | 12.85                               | 6.02                              |
| <b>C/Ni<sub>3</sub>ZnC<sub>0.7</sub>-B1@PP</b> | 1.95                           | 11.01                               | 5.08                              |

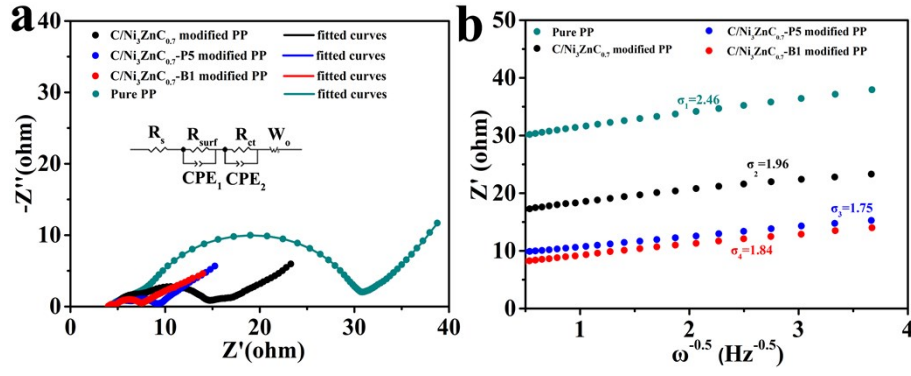

**Figure S11.** EIS fitting results of cells with C/Ni<sub>3</sub>ZnC<sub>0.7</sub>@PP, C/Ni<sub>3</sub>ZnC<sub>0.7</sub>-P5@PP and C/Ni<sub>3</sub>ZnC<sub>0.7</sub>-B1@PP and pure PP separator after cycling.

**Table S4.** EIS fitting results of cells with C/Ni<sub>3</sub>ZnC<sub>0.7</sub>@PP, C/Ni<sub>3</sub>ZnC<sub>0.7</sub>-P5@PP and C/Ni<sub>3</sub>ZnC<sub>0.7</sub>-B1@PP and pure PP separator after cycling.

| Sample                                      | $R_s/\Omega$ | $R_{surf}/\Omega$ | $R_{ct}/\Omega$ |
|---------------------------------------------|--------------|-------------------|-----------------|
| Pure PP                                     | 4.26         | 4.14              | 21.66           |
| C/Ni <sub>3</sub> ZnC <sub>0.7</sub> @PP    | 4.84         | 1.73              | 6.76            |
| C/Ni <sub>3</sub> ZnC <sub>0.7</sub> -P5@PP | 4.81         | 2.31              | 2.00            |
| C/Ni <sub>3</sub> ZnC <sub>0.7</sub> -B1@PP | 4.11         | 0.48              | 2.33            |

After cycling, the internal resistances  $R_s$  of all these cells increase (Figure S11 a-b and Table S3), but the cell with C/Ni<sub>3</sub>ZnC<sub>0.7</sub>-B1@PP exhibits smallest internal resistance  $R_s$  (4.11  $\Omega$ ). Besides, the C/Ni<sub>3</sub>ZnC<sub>0.7</sub>-B1 modification layer contributes to the smaller Warburg coefficient ( $\sigma_4=1.84$ ), demonstrating the fast solid-diffusion of Li ions going through the solid C/Ni<sub>3</sub>ZnC<sub>0.7</sub>-B1 modification layer. More importantly, the cell with C/Ni<sub>3</sub>ZnC<sub>0.7</sub>-B1 modification layer also exhibits much decreased charge transfer resistance  $R_{ct}$  (2.33  $\Omega$ ). The fast-paced charge transfer behavior is conducive to boosting the conversion kinetics of polysulfides.

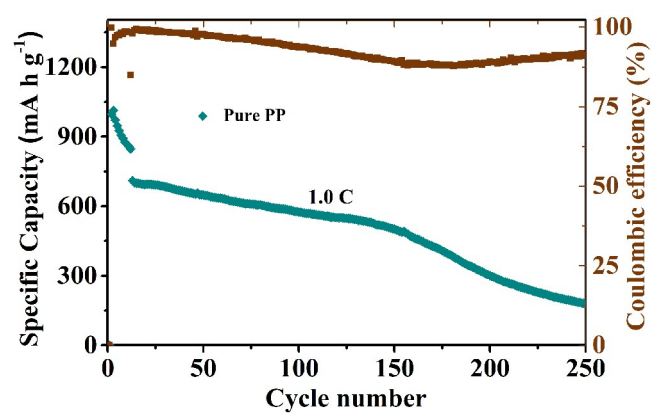

**Figure S12.** The cycling performance of the cell using pure PP separator.

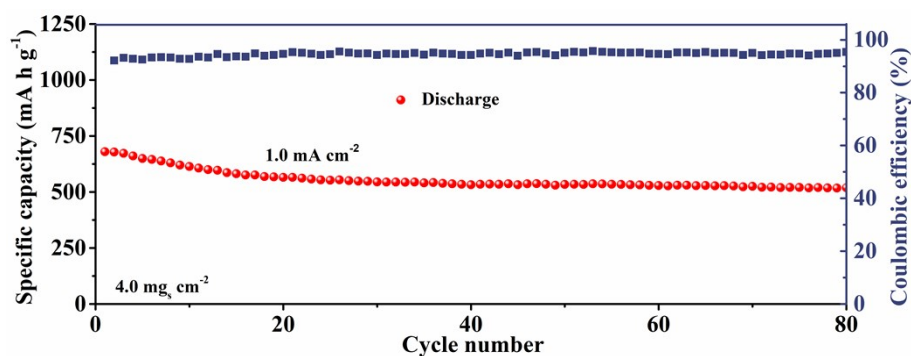

**Figure S13.** Cycling performance of the cell using C/Ni<sub>3</sub>ZnC<sub>0.7</sub>-B1 modified PP separator at 1.0 mA cm<sup>-2</sup> with a sulfur loading of 4.0 mg cm<sup>-2</sup>.

## Reference

- 1 W. J. Jiang, S. Niu, T. Tang, Q. H. Zhang, X. Z. Liu, Y. Zhang, Y. Y. Chen, J. H. Li, L. Gu, L. J. Wan and J. S. Hu, *Angew. Chem. Int. Ed.*, 2017, **56**, 6572-6577.
- 2 O. Akdim, R. Chamoun, U. B. Demirci, Y. Zaatar, A. Khoury and P. Miele, *Int. J. Hydrogen Energy*, 2011, **36**, 14527-14533.
- 3 H. Song, J. Su and C. Wang, *ACS Appl. Energy Mater.*, 2018, **1**, 5008-5015.
- 4 P. Zhang, M. Wang, Y. Yang, T. Yao, H. Han and L. Sun, *Nano Energy*, 2016, **19**, 98-107.
- 5 X. Liang, C. Hart, Q. Pang, A. Garsuch, T. Weiss and L. F. Nazar, *Nat Commun*, 2015, **6**, 5682.
- 6 S. Wang, J. Liao, X. Yang, J. Liang, Q. Sun, J. Liang, F. Zhao, A. Koo, F. Kong, Y. Yao, X. Gao, M. Wu, S. Z. Yang, R. Li and X. Sun, *Nano Energy*, 2019, **57**, 230-240.
- 7 X. Chen, Z. Yu, L. Wei, Z. Zhou, S. Zhai, J. Chen, Y. Wang, Q. Huang, H. E. Karahan and X. Liao, *J. Mater. Chem. A*, 2019, **7**, 764-774.
